# Supplementary material for: Enhancing Lung Cancer Classification through Integration of Liquid Biopsy Multi-Omics Data with Machine Learning Techniques
Source: MDPI journal article supplement (doi:10.3390/cancers15184556), 2023-09-14
Supplement: s1 [file s1]

Supplementary Figures

## **Enhancing Lung Cancer Classification Through Integration of Liquid Biopsy Multi-Omics Data with Machine Learning Techniques**

**Hyuk-Jung Kwon<sup>1,2†</sup>, Ui-Hyun Park<sup>1†</sup>, Chul Jun Goh<sup>1</sup>, Dabin Park<sup>1</sup>, Yu Gyeong Lim<sup>1</sup>, Isaac Kise Lee<sup>1,2,3</sup>, Woo-Jung Do<sup>1</sup>, Kyoung Joo Lee<sup>1</sup>, Hyojung Kim<sup>1</sup>, Seon-Young Yun<sup>1</sup>, Jounghsu Joo<sup>1</sup>, Na Young Min<sup>1</sup>, Sunghoon Lee<sup>1</sup>, Sang-Won Um<sup>4</sup>, Min-Seob Lee<sup>1,5\*</sup>**

<sup>1</sup> R&D Department, Eone-Diagnomics Genome Center, Inc., 291 Harmony-ro, Yeonsu-gu, Incheon, 22014, Republic of Korea

<sup>2</sup> Department of Computer Science and Engineering, Incheon National University (INU), Incheon, 22012, South Korea,

<sup>3</sup>NGENI Foundation, California, USA

<sup>4</sup>Division of Pulmonary and Critical Care Medicine, Department of Medicine, Samsung Medical Center, Sungkyunkwan University School of Medicine, 81 Irwon-ro, Gangnam-gu, Seoul, 06351, Republic of Korea

<sup>5</sup>Diagnomics, Inc., 5795 Kearny Villa Rd. San Diego, CA 92123, USA

<sup>†</sup>These authors contributed equally

\*Correspondence: Min Seob Lee, Ph.D.

Eone-Diagnomics Genome Center, Inc., 291 Harmony-ro, Yeonsu-gu, Incheon, 22014, Republic of Korea

Phone No: +82-10-3080-1393

Email: mlee@edgc.com

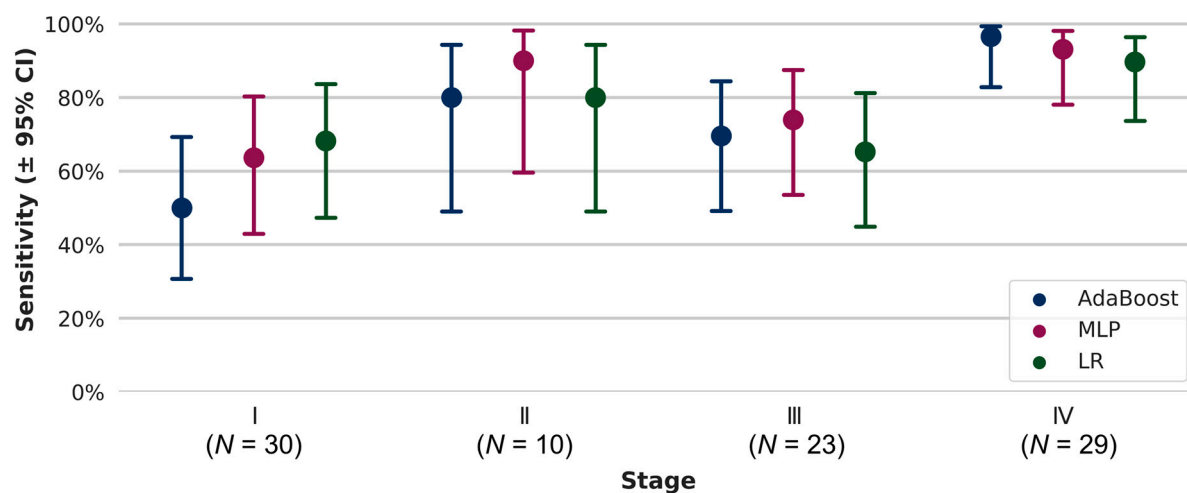

**Supplementary Figure S1.** Sensitivity plot representing stage-wise cancer detection performance of each machine learning model. The sensitivity values of the three machine learning models, AdaBoost (blue dots), MLP (dark red dots), and LR (dark green dots), are presented using a dot plot. The x-axis shows the stages of lung cancer and 'N' indicates the number of patients. The y-axis represents the sensitivity values. The lines extending above and below each dot represent the 95% confidence interval for that value, considering a specificity of 90%.

A

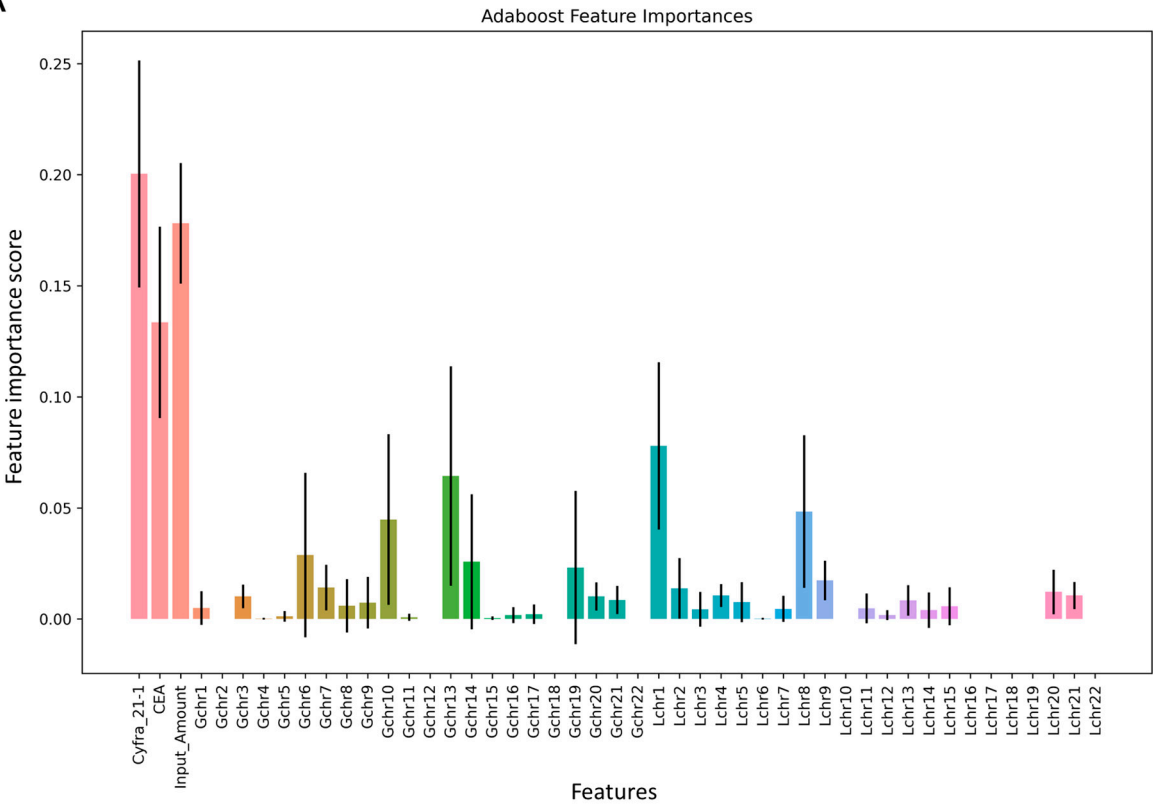

B

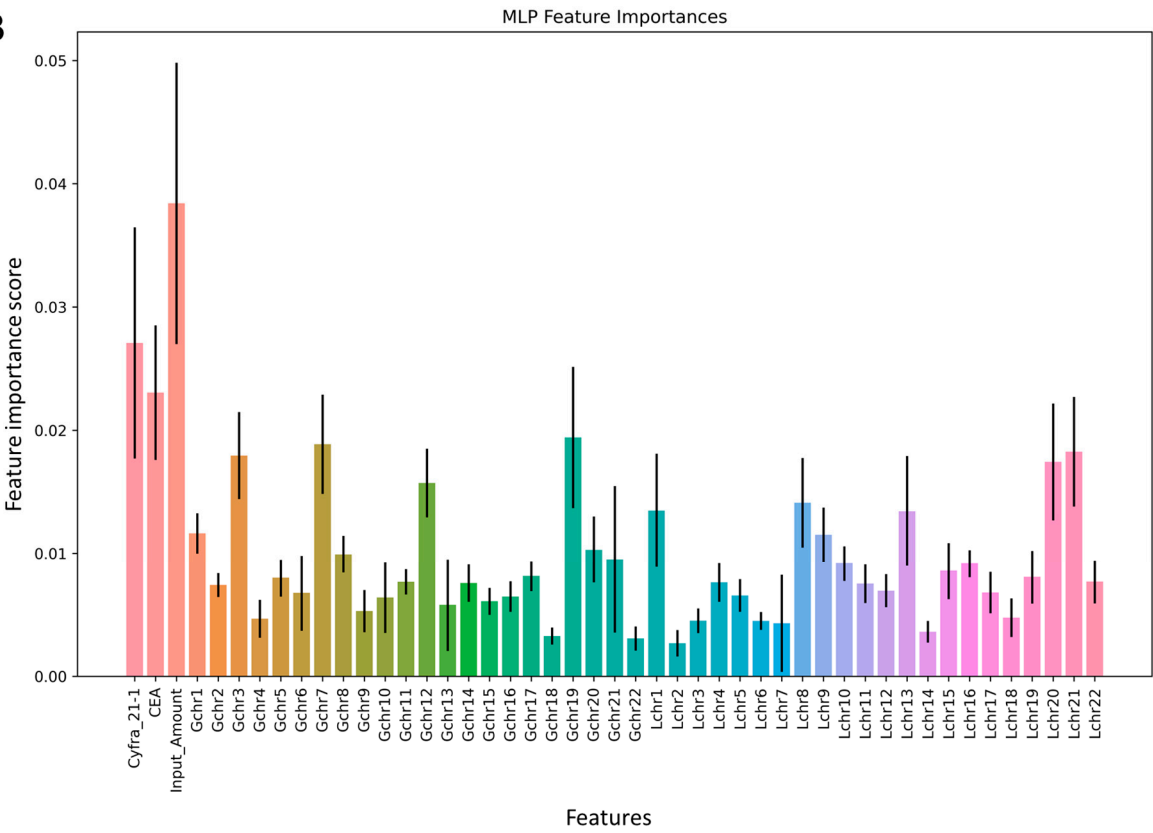

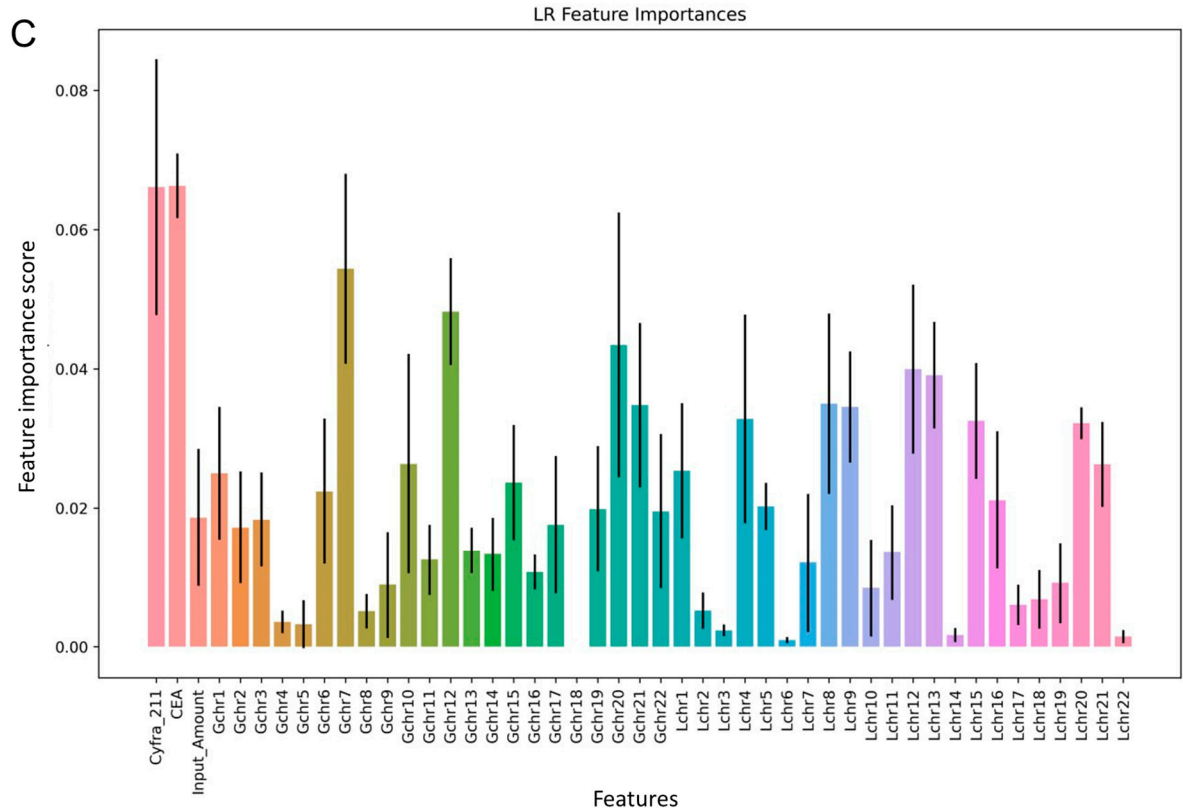

**Supplementary Figure S2.** Feature importance score of combined multi-omics data in AdaBoost model. Feature importance, encompassing all multi-omics data, for the AdaBoost (A), MLP (B), and LR (C) models in lung cancer prediction, quantified as the mean absolute values. The legend indicates the significance of the blood cancer markers (Cyfra21-1 and CEA), cfDNA concentration (Input\_amount), and copy number variation (CNV, Gchr1~Lch22).
